# Supplementary material
Source: HighWire-hosted journal article supplement (https://rapm.bmj.com/content/46/9/752)
Supplement: inline-supplementary-material-1 [file inline-supplementary-material-1.pdf]

**Preoperative Medications:**

1. 650 mg oral acetaminophen
2. 25 mg oral hydroxyzine
3. 20 mg oral famotidine
4. 10 mg extended release oxycodone
5. 300-600 mg oral gabapentin
